# Supplementary material for: Non-Destructive Banana Ripeness Detection Using Shallow and Deep Learning: A Systematic Review
Source: MDPI journal article supplement (doi:10.3390/s23020738), 2023-01-09
Supplement: s1 [file s1]

**Table S1.** Collection data from the detection of banana ripeness studies

| Authors                                     | Types of banana samples       | Varieties of banana categories | Wavelength/spectrum        | Measurement tool                                                               | Camera/Sensor                     | Color space | Features                                          | Classification stages                                                                                                                                         | No. of data samples | Methods                                                                                                                | Results (Accuracy & coefficient of determination $R^2$ )                                                                                                          |
|---------------------------------------------|-------------------------------|--------------------------------|----------------------------|--------------------------------------------------------------------------------|-----------------------------------|-------------|---------------------------------------------------|---------------------------------------------------------------------------------------------------------------------------------------------------------------|---------------------|------------------------------------------------------------------------------------------------------------------------|-------------------------------------------------------------------------------------------------------------------------------------------------------------------|
| (Mendoza and Aguilera [43], (2004)          | Fingers by hand, single batch | Musa cavendish                 | Visible                    | Colorimeter Hunter Lab with CIE standard illuminant D65, Digital refractometer | Fluorescent lamps, Digital camera | RGB         | $L^*$ , $a^*$ , $b^*$ ; BSA; NBS; texture feature | <b>7 stages</b> - green, green to traces of yellow, more green than yellow, more yellow than green, green tip, yellow, all yellow, yellow, flecked with brown | 127                 | <b>Feature selection method</b> - Sequential forward selection (SFS)<br><b>Classifier</b> : Discriminant analysis (DA) | Classification Accuracy using DA- 98%                                                                                                                             |
| (Mazen and Nashat [6], 2019a)               | Fingers                       | Egyptian's species             | Visible                    | NA                                                                             | Digital camera                    | RGB and HSV | color, BSA, texture feature                       | <b>4 stages</b> - unripe (green banana), yellowish green, mid-ripe, overripe                                                                                  | 300                 | ANN, SVM, Naïve Bayes classifier, KNN, Decision tree                                                                   | ANN- 97.75 %, SVM -96.6%, Naïve Bayes classifier- 95.5%, KNN-95.5%, Decision tree-97.75%                                                                          |
| (S. E. Adebayo et al. [18], 2017)           | Fingers                       | Not reported                   | 532, 660, 785, 830, 1060nm | DA, universal testing machine, and Digital refractometer                       | LLBI, CCD                         | Laser, CCD  | Chlorophyll, Elasticity, SSC                      | <b>6 stages (2-7)</b> - all green, green with some yellow, yellow with some green, yellow with few green, all yellow with some brown patches                  | 270                 | ANN                                                                                                                    | - Chlorophyll prediction (532nm) = 0.949 ( <b>R2</b> )<br>- Elastic modulus, SSC (785, 830nm) = 0.862, 0.867 ( <b>R2</b> )<br>- ANN classification (830nm)- 95.5% |
| (Adebayo et al. [17], 2016)                 | Fingers                       | Musa Cavendish                 | 532, 660, 785, 830, 1060nm | DA, universal testing machine, and Digital refractometer                       | LLBI, CCD                         | Laser, CCD  | Elasticity, SSC, chlorophyll                      | <b>6 stages (2-7)</b> - all green, green with some yellow, yellow with some green, yellow with few green, all yellow with some brown patches                  | 270                 | ANN                                                                                                                    | Accuracy- 97.53% (830, 1060)                                                                                                                                      |
| (Saranya, Srinivasan, and Kumar, [9], 2021) | Fingers                       | Egyptian's species             | Visible                    | NA                                                                             | Digital camera                    | RGB         | NA                                                | <b>3 stages</b> - Ripe, partially ripe, ripen and overripe                                                                                                    | 273                 | CNN model (Transfer learning)- VGGNet 16, ResNet50)                                                                    | - <b>Actual Dataset</b> : Accuracy-94.93%, Validation -87.5%<br>- <b>Augmented dataset</b> : Accuracy- 96.14%, Validation - 92.85%                                |
| (Ramadhan et al. n.d., [19])                | Fingers                       | Musa Cavendish                 | Visible                    | NA                                                                             | Digital camera                    | RGB         | NA                                                | <b>4 stages</b> - Unripe, Almost-Ripe, ripe Through Ripe                                                                                                      | 300                 | CNN                                                                                                                    | 71.95%.                                                                                                                                                           |

|                                |                 |                |                            |                                                                                                   |                                   |                     |                                                                             |                                                                                                                                                                 |                              |                              |                                                                                                                                                                                       |
|--------------------------------|-----------------|----------------|----------------------------|---------------------------------------------------------------------------------------------------|-----------------------------------|---------------------|-----------------------------------------------------------------------------|-----------------------------------------------------------------------------------------------------------------------------------------------------------------|------------------------------|------------------------------|---------------------------------------------------------------------------------------------------------------------------------------------------------------------------------------|
| (Zhuang et al., [20] 2019)     | Fingers         | Musa Cavendish | Visible                    | NA                                                                                                | Camera, CCD                       | HSV, L*a*b*, CIE    | Peel color, local textual, local shape (top, middle, tip) using UP-LBP, HOG | <b>4 stages-</b> all-green, mostly yellow with some or a little bit of green, all yellow, mostly yellow with some or many brown spots                           | 441                          | Naïve Bayes, LDA, SVM        | <b>Naïve Bayes, LDA, SVM-</b><br>- color feature: 99.2%, 99.2%, 100%, and 99.2%<br>-local texture feature: 92.6%, 86.8%, and 93.4%<br>- local shape features: 84.3%, 83.5%, and 82.6% |
| (Sabilla et al., [21], 2019)   | Fingers         | other species  | Visible                    | NA                                                                                                | Camera                            | RGB                 | Banana peel and images                                                      | <b>7 Category-</b> Ambon, Candi, Emas, Kepok, Raja, Santen, Susu                                                                                                | <b>Augmented data-</b> 5,193 | KNN, SVM, Decision Tree      | - KNN and DT- 99.1% in terms of detecting the category of banana -SVM-96.6%                                                                                                           |
| (Hou et al., [22], 2015)       | Fingers         | Musa Cavendish | Visible                    | portable tri-stimulus colorimeter (stalk, middle and tip)                                         | Spectrometer                      | Spectral image      | L*, a*, b*                                                                  | <b>7 stages-</b> green, green to traces of yellow, more green than yellow, more yellow than green, green tip and yellow, all yellow, yellow, flecked with brown | 210                          | SVM                          | -Radial-based kernel: 96.5%<br>-Linear-based kernel: 95.0%                                                                                                                            |
| (Adebayo et al., [35], 2017)   | Fingers         | Musa Cavendish | 532, 660, 785, 830, 1060nm | ΔA meter, TA. XT Plus Texture Analyze                                                             | LLBI, CCD                         | CCD, laser          | Chlorophyll, Elasticity, SSC                                                | <b>6 stages (2-7)-</b> all green, green with some yellow, yellow with some green, yellow with few green, all yellow with some brown patches                     | 270                          | SVM                          | 92.5%                                                                                                                                                                                 |
| (Cho and Koseki, [10], 2021)   | Fingers         | Musa Cavendish | 250mm                      | Table-Top Universal testing Instruments using a cylindrical probe, refractometer, and colorimeter | Smartphone with 2-LED             | HSV, L*a*b*, YUV    | Firmness, pH, ratio pulp to peel                                            | <b>3 stages-</b> Unripe, Ripe, Overripe                                                                                                                         | 440                          | ANN                          | <b>R2-</b><br>- Firmness: 0.97, TSS-0.96, pH - 0.60, ratio pulp to peel - 0.64                                                                                                        |
| (Zhang et al., [23], 2018)     | Fingers         | Musa Cavendish | Visible                    | NA                                                                                                | Fluorescent lamps, Digital camera | RGB                 | color, shape, texture of the banana, local, and global features             | <b>7 stages and 14 stages</b>                                                                                                                                   | 197                          | CNN                          | <b>-7 ripening stages:</b> accuracy- 94.4%, precision-95.6%, Recall -92.3%<br><b>-14 ripening stages:</b> Accuracy- 92.3 %, Precision- 93.5%, Recall - 93.1%                          |
| (Kipli et al., [38], 2018)     | Fingers by hand | Not reported   | Visible                    | NA                                                                                                | Smartphone                        | Global cloud vision | Color Dominant Extraction                                                   | <b>3 stages-</b> Unripe, Ripe, Overripe                                                                                                                         | 338                          | J48 classification algorithm | Classification accuracy (training size of 30, 338)- 87.10%, 96.15%                                                                                                                    |
| (Mohamedon et al., [41], 2021) | Mixed           | Not reported   | Visible                    | NA                                                                                                | Smartphone                        | RGB                 | Color features                                                              | <b>3 stages-</b> Unripe, Ripe, Overripe                                                                                                                         | 571                          | CNN using transfer learning  | Accuracy- 98.25%                                                                                                                                                                      |

|                                   |                             |                                     |         |                                  |                                                                                              |        |                                                                           |                                                                                                                                                           |                                                                                  |                                                                                                 |                                                                                                                                                                                                                                                                                       |
|-----------------------------------|-----------------------------|-------------------------------------|---------|----------------------------------|----------------------------------------------------------------------------------------------|--------|---------------------------------------------------------------------------|-----------------------------------------------------------------------------------------------------------------------------------------------------------|----------------------------------------------------------------------------------|-------------------------------------------------------------------------------------------------|---------------------------------------------------------------------------------------------------------------------------------------------------------------------------------------------------------------------------------------------------------------------------------------|
| (Saragih and Emanuel, [44], 2021) | Fingers and fingers by hand | Egyptian species and not reported * | Visible | NA                               | Smartphone                                                                                   | RGB    | RGB, HSV, L*a*b*, texture                                                 | <b>4 stages-</b> unripe/green, yellowish - green, mid ripen, overripe                                                                                     | 436                                                                              | MobileNet V2, NASNet Mobile(P retrained model)                                                  | Accuracy- Mobile Net V2 - 96.18%, NASNetMobile- 90.84%                                                                                                                                                                                                                                |
| (Altat et al., [37], 2020)        | Fingers by hand             | Not reported                        | Visible | NA                               | Wireless sensor                                                                              | Sensor | Temperature, humidity level, ethylene concentration, carbon dioxide level | <b>6 stages-</b> natural green, light green with light yellow, yellow with light green, yellow with brown spots, full yellow, and yellow with green ends. | 8 samples                                                                        | ANN                                                                                             | Overall accuracy- 96.78 %                                                                                                                                                                                                                                                             |
| (Chen et al., [40], 2018)         | Bunch                       | Musa Cavendish                      | Visible | NA                               | Digital camera, Electronic-nose using DAQ, E-nose/Camera                                     | RGB    | aroma, color                                                              | <b>4 Stages-</b> unripe, half-ripe, fully ripe, overripe                                                                                                  | <b>Sensor-</b> 105 measurements (7 days), <b>Peel color changes-</b> 105 samples | -PC +KNN - PCA+SVM -LDA + KNN -LDA + SVM                                                        | <b>-Using camera (Feature=3)-</b> PCA +KNN= 99.05%, PCA+SVM= 97.14%, LDA + KNN= 99.05%, LDA + SVM= 94.29% <b>-Using E-nose (Feature=7)-</b> PCA +KNN= 98.10%, PCA+SVM= 95.24%, LDA + KNN = 90.48%, LDA + SVM= 86.67% <b>-Using E-nose/Camera (Feature=10)-</b> 100% (from all models) |
| (Zhu and Spachos, [24], 2021)     | Fingers                     | Not reported                        | Visible | NA                               | Camera                                                                                       | HSV    | HSV, texture                                                              | <b>3 Stages-</b> un-ripened, ripened, and over-ripened                                                                                                    | <b>Actual data-</b> 150, <b>After augmentation-</b> 1000                         | <b>Classifier I-</b> KNN, RF, NB and SVM <b>Classifier 2-</b> YOLO v3 model (transfer learning) | -SVM-98.5% (I classifier-higher) -YOLO v3 model- 85.7% (mid-ripped and well-ripped-classifier II -Overall accuracy- 96.4%                                                                                                                                                             |
| (Mueez, [25], 2020)               | Fingers                     | Egyptian's species                  | Visible | NA                               | Raspberry Pi 4 model B with sonar fitted, Camera                                             | HSV    | color of a peel                                                           | <b>4 stages-</b> green, yellowish-green, mid-ripen, overripen                                                                                             | 273                                                                              | KNN                                                                                             | -Actual data: 85% -Augmented data: 97.75%                                                                                                                                                                                                                                             |
| (Suthagar et al., [11], 2021)     | Fingers                     | Not reported                        | Visible | MQ-3, MQ-6, MQ-8, MQ-135 sensors | An electronic nose, Arduino Board, LCD, Exhauster fan, and an array of sensors, Camera image | RGB    | color and shape                                                           | <b>3 Stages-</b> UR-un-ripe stage; R&UR-neither ripe nor un-ripe stage; R-ripen stage.                                                                    | 24                                                                               | An electronic nose, image processing technique, and manual                                      | Accuracy -94.44%                                                                                                                                                                                                                                                                      |
| (Zhu and Spachos, [24], 2021)     | Fingers                     | Not reported                        | Visible | NA                               | Camera                                                                                       | HSV    | HSV, texture                                                              | <b>3 stages-</b> Un-ripped, ripped, overripped                                                                                                            | <b>Actual -</b> 150                                                              | SVM and YOLOv3 models                                                                           | <b>Accuracy-</b> ( Overall accuracy -96.4%)                                                                                                                                                                                                                                           |

|                                                         |                 |                        |         |                                    |                                              |                        |                                                                                                  |                                                                                                                                                                               |                             |                                        |                                                                                                       |
|---------------------------------------------------------|-----------------|------------------------|---------|------------------------------------|----------------------------------------------|------------------------|--------------------------------------------------------------------------------------------------|-------------------------------------------------------------------------------------------------------------------------------------------------------------------------------|-----------------------------|----------------------------------------|-------------------------------------------------------------------------------------------------------|
| [26], 2020)                                             |                 |                        |         |                                    |                                              |                        |                                                                                                  | <b>2 stages (2 layers)-</b> mid-ripped, well ripped                                                                                                                           | <b>Augmented- 650</b>       |                                        | -SVM classifier-I: 98.5%<br>-YOLOv3 model-classifier II: 89.5%                                        |
| (Maimunah et al. [27])                                  | Fingers         | Musa Cavendish (Ambon) | Visible | NA                                 | Digital Camera, LCD                          | HSV                    | RGB, HSV, $L^*a^*b^*$ , texture                                                                  | <b>3 Stages -</b> stage 2, stage 3, stage 4 (maturity classes)                                                                                                                | 105                         | Naïve Bayes, neural network classifier | <b>Accuracy-</b><br>-Naïve Bayes classifier I): 90.58%<br>-Neural network model-classifier II: 95.24% |
| (Iswari, Wella, and Ranny, [28], 2017)                  | Fingers         | Musa Cavendish         | Visible | Refractometer                      | Digital Camera                               | RGB                    | 3 colors, number of dots (yellow, green, brown), no of dots on a banana skin, sweetness level    | <b>3 categories-</b> Banana, apple, melon                                                                                                                                     | 42                          | KNN                                    | Graphical results                                                                                     |
| (Sanaeifar et al., [36], 2014)                          | Fingers         | Musa Cavendish         | Visible | MQ-3, MQ-6, MQ-135, MQ-131 sensors | Electronic nose                              | Sensors                | 3 colors and number of dots (yellow, green, brown), no of dots on a banana skin, sweetness level | <b>7 stages-</b> green, light green, half green and half yellow, more yellow than green, yellow with green tips, full yellow, and yellow with brown spots.                    | 15                          | PCA, SIMCA, LDA, and SVM               | <b>Accuracy-</b><br>- SVM: 98.66%<br>- SIMCA: 92%<br>- LDA: 97.6%                                     |
| (Rodriguez et al., [42], 2021)                          | Mixed           | Not reported           | Visible | NA                                 | Camera                                       | RGB                    | NA                                                                                               | <b>2 stages-</b> ripe and unripe                                                                                                                                              | NA                          | VGG, VGG-16                            | Graphical results                                                                                     |
| (Marimuthu and Mohamed Mansoor Roomi, [39], 2017)       | Fingers by hand | Musa Cavendish         | Visible | NA                                 | Digital Camera                               | RGB, HSV               | pH, NBA                                                                                          | <b>3 stages-</b> ripe, overripe, unripe                                                                                                                                       | <b>Augmented data-</b> 3108 | FMCBR                                  | Overall model accuracy -93.11%                                                                        |
| (Zulkifli et al., [4], 2019)                            | Fingers         | Musa Cavendish         | 658nm   | Colorimeter, Digital refractometer | LLBI, CCD                                    | CCD row data           | $L^*a^*b^*$ , firmness, TSS, pH                                                                  | <b>6 stages (2- 7)-</b> all green, green with some yellow, yellow with some green, yellow with few green, all yellow with some brown patches<br><b>2 groups-</b> unripe, ripe | 480                         | LDA                                    | Overall model accuracy- 94.2%                                                                         |
| (Intaravanne, Sumriddechajorn, and Nukeaw, [32], 2012b) | Fingers         | Musa Cavendish         | 365nm   | NA                                 | Smartphone, visible and Fluorescent spectral | RGB, ultraviolet light | White light ratio, ultraviolet light ratio                                                       | <b>3 Stages-</b> immature, ripe, overripe                                                                                                                                     | 10                          | NA                                     | Graphical results                                                                                     |

|                                                                   |         |                      |                             |                                          |                                              |                                |                                                                                                     |                                                                        |                                |                                          |                                                                                                                                                                                                                                                                      |
|-------------------------------------------------------------------|---------|----------------------|-----------------------------|------------------------------------------|----------------------------------------------|--------------------------------|-----------------------------------------------------------------------------------------------------|------------------------------------------------------------------------|--------------------------------|------------------------------------------|----------------------------------------------------------------------------------------------------------------------------------------------------------------------------------------------------------------------------------------------------------------------|
| (Saadl et al., [30], 2009)                                        | Fingers | Not reported         | Visible                     | NA                                       | Webcam                                       | RGB                            | Color                                                                                               | <b>3 Stages-</b><br>unripe, ripe, overripe                             | 60                             | ANN                                      | Classify 25 samples correctly out of 28 samples(images)                                                                                                                                                                                                              |
| (Taghoy and Villaverde, [31], 2018)                               | Fingers | Musa Cavendish       | Visible                     | MQ3, DHT22 temperature sensor            | Arduino Uno                                  | NA                             | Temperature, ethylene gas                                                                           | <b>3 Stages-</b><br>unripe, ripe, overripe                             | 1                              | fuzzy logic approach (toolbox in MATLAB) | Linear regression(R2)- 0.94                                                                                                                                                                                                                                          |
| (Intaravanne, Sumriddetchkajorn, and Nukeaw, [29], 2012a)         | Fingers | Musa Cavendish       | Visible                     | NA                                       | Smartphone, visible and Fluorescent spectral | White light, ultraviolet light | White light, ultraviolet light ratio                                                                | <b>3 Stages-</b><br>immature, ripe, and overripe                       | 10                             | NA                                       | Graphical results                                                                                                                                                                                                                                                    |
| (Xie, Chu, and He, [33], 2018)                                    | Fingers | Musa Cavendish       | Near-infrared (380-1023 nm) | colorimeter, texture analyzer            | Hyperspectral imaging                        | Hyperspectral imaging          | L*a*b*, firmness                                                                                    | <b>2 Stages-</b> ripe, unripe                                          | 168                            | PLS-DA model<br>-PC1 + PC2<br>-PC1 + PC3 | <b>-R2 values-</b><br>0.795(L*), 0.972(a*), 0.773 (b*) and 0.760 (firmness)<br><b>- RPD value-</b><br>2.234(L*), 6.098(a*), 2.119 (b*) and 2.062, (firmness).<br>- First three PCs (ripe and unripe)- 98.95% of the variance (PC1: 84.83%, PC2:12.63% and PC3:1.49%) |
| (Quevedo et al., [3], 2008)                                       | Fingers | Musa Cavendish       | Visible                     | NA                                       | Digital camera, Fluorescent spectral         | RGB                            | fractal texture                                                                                     | NA                                                                     | 5                              | Fractal Fourier method                   | Graphical results                                                                                                                                                                                                                                                    |
| (Mohapatra, Shanmugasundaramadha n, and Malmathannraj, [5], 2017) | Fingers | Musa cavendish (Red) | Visible                     | Dielectric properties measurement system | Digital camera                               | RGB                            | capacitance, relative, permittivity, impedance, and admittance changing during the ripening process | <b>7 Grade/ Stages - 1 to 7</b>                                        | 140                            | Nearest neighbor, FCM                    | <b>Average precision accuracy (%)</b> -<br>-CLBP + FCM- 96.82 %<br>- LBP + FCM- 93.91 %<br>- NRLBP + FCM- 97.61 %<br><b>Accuracy (nearest neighbor)</b> - Grade 1- 86 %, Grade 2- 86%, Grade 3-84 %, Grade 4- 84%, Grade 5- 86%, Grade 6- 84%, Grade 7-84%           |
| (Vaviya et al. n.d., [34])                                        | Fingers | Not reported         | Visible                     | NA                                       | Smartphone                                   | RGB                            | color and size                                                                                      | <b>2 Stages-</b><br>Unripe- ripened using CaC2, Unripe- ripe naturally | <b>Augmented data-</b><br>1000 | CNN                                      | 97%                                                                                                                                                                                                                                                                  |

NA- Not available, RGB- Red Green Blue, HSV- Hue Saturation Value, CCD- Charged Coupled Device, LLBI- Laser light backscattering imaging, VNIR- Resonon, Inc. visible near-infrared Pika L hyperspectral imaging, SSC- Soluble solid content, TSS- Total soluble content, YUV- Luminance and chrominance, NBA- Normalized brown area, pH- Peak hue, CNN- Convolutional Neural Network, ANN- Artificial Neural Network, BSA/cm<sup>2</sup>- Brown spots percentage of the total area, NBS/cm<sup>2</sup>- Number of brown spots per cm<sup>2</sup> of surface, UP-LBP- Local binary pattern Component Analysis, LDA- Linear Discriminant Analysis, KNN- K-Nearest Neighbor, DA- Delta Absorbance, PLS-DA- Partial least squares

discrimination analysis, DAQ- Data Acquisition Card, LED-Light emitting diode, FMCBF- Fuzzy modeling for the classification of Banana Ripeness, GUI-Graphical user interface, E-nose- Electronic nose, and LCD-Liquid crystal display, Sequential forward selection(SFS) method.

**Table S2.** Performance metrics for all included studies

| Performance Metrics | Number of studies | Mean $\pm$ SD values |
|---------------------|-------------------|----------------------|
| Accuracy            | 27                | 93.42 $\pm$ 5.24     |
| $R^2$               | 3                 | 0.85 $\pm$ 0.079     |
| Graphical results   | 5                 | -                    |

**Table S3.** Graphical representation studies for banana ripeness detection

| Author (Year)                          | Graphical representation                         |
|----------------------------------------|--------------------------------------------------|
| Iswari, Wella, and Ranny, [28], (2017) | Application-based output (no numeric values)     |
| Rodrigues et al., [42], (2021)         | Probabilistic object identification-based output |
| Intaravanne et al., [29], (2012)       | Image-based output                               |
| Intaravanne et al., [32], (2012)       | Image-based output                               |
| Quevedo et al., [3], (2008) *          | Image-based output                               |

Provided the graphical representation with fractal dimension ( $FD_n$ ) value from 2.02 to 2.20.

**Table S4.** Following scoring, a scheme has been used for the quality assessment in this systematic review (\* represented the scoring detailed information of the table)

|                                                         |                                                        |
|---------------------------------------------------------|--------------------------------------------------------|
| Capturing device score                                  | 1(reported), 0 (Not reported/in completed information) |
| Number of samples (median thresholds)                   | 1(above the threshold value), otherwise 0              |
| Number of banana stages (mode thresholds)               | 1(above the threshold value), otherwise 0              |
| Result score (Accuracy/correlation) (median thresholds) | 1(above the threshold value), otherwise 0              |

\*The capturing device score is considered as 1 if the detailed information of the device is mentioned in the studies. For the “number of samples”, the score is 1 if it is more than the median threshold value and otherwise 0; similarly for the field “result score”. In the case of “number of banana stages”, the mode threshold value was used and the quality assessment of the studies was performed between the total score of 0 and 4 (if the value is between 0 and 2, it is considered as weak, 3 is considered fair and if the score  $> 4$  it is considered as a strong study).

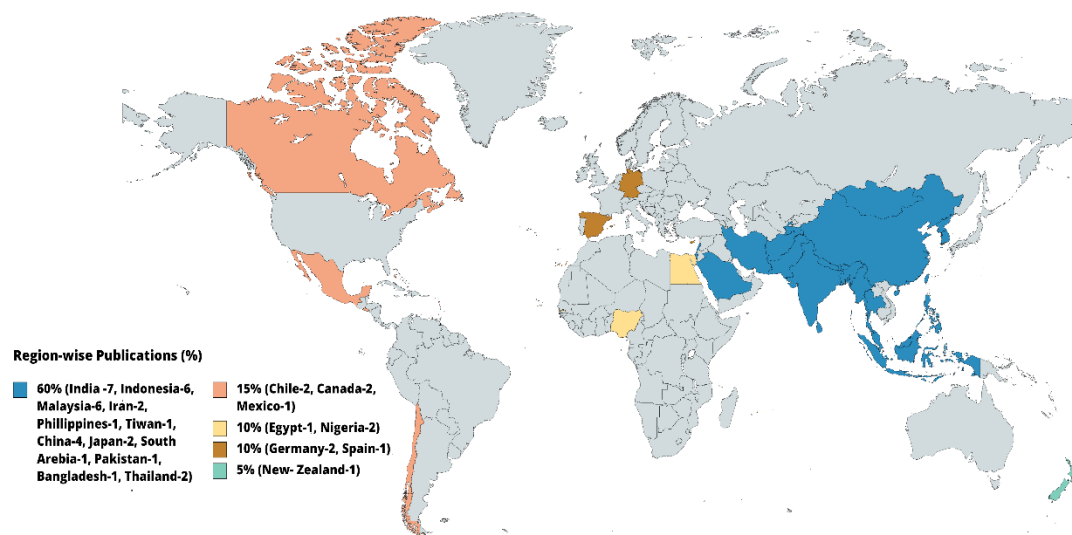

Figure S1. Region-wise publication based on author's affiliation

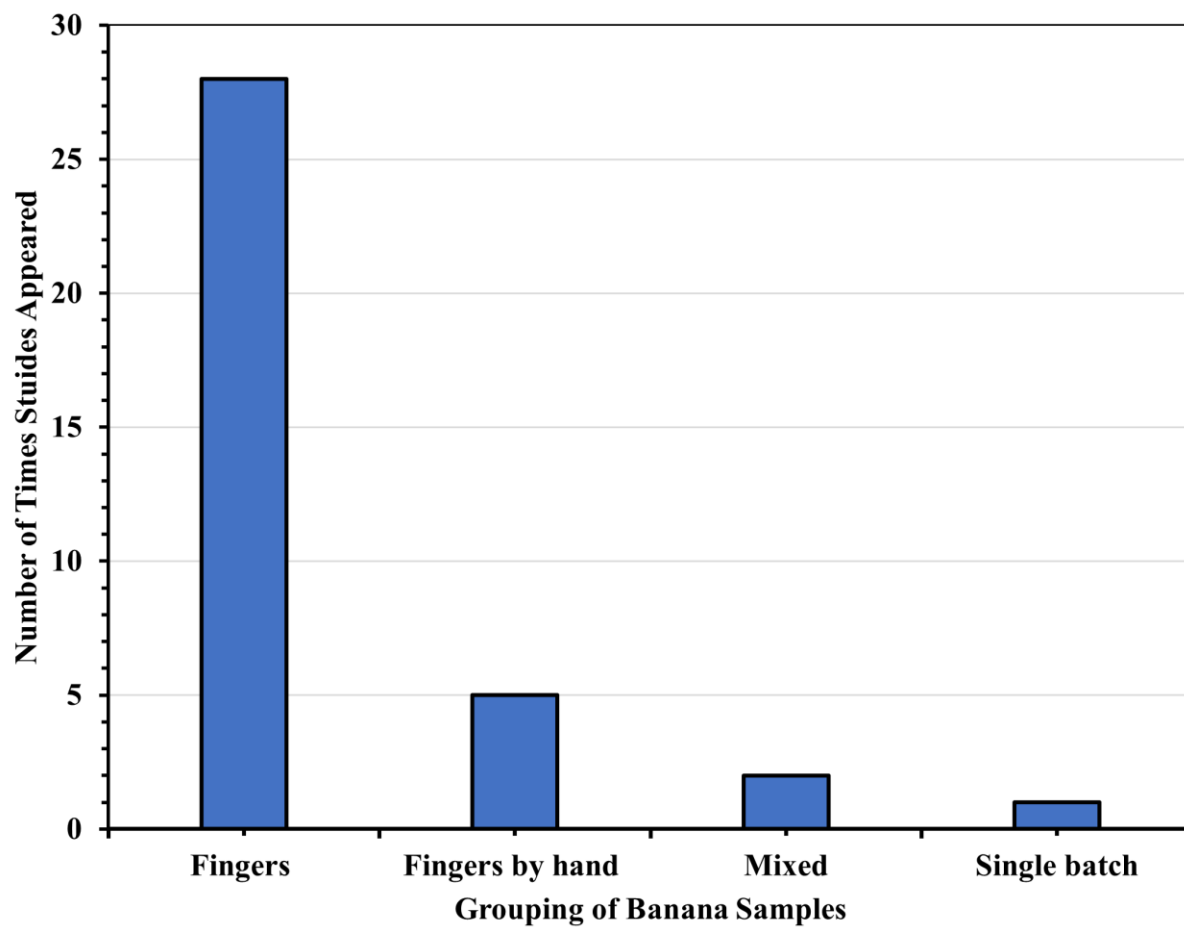

**Figure S2.** Grouping of banana samples used for detecting banana ripeness: single batch, bunch, mixed, fingers by hand, fingers, and Not Available (NA).

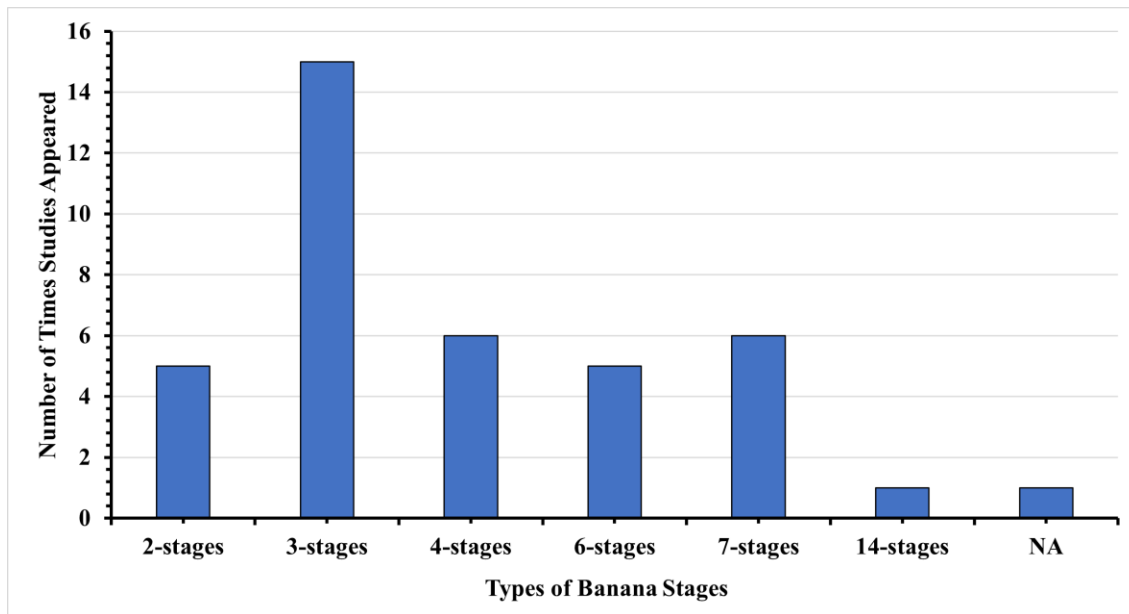

**Figure S3.** Types of different stages used for the detection of banana ripeness studies
